# Supplementary material for: Weighted analysis of general microarray experiments
Source: PubMed Central journal article supplement (PMC2175522; doi:10.1186/1471-2105-8-387), 2007-10-15

**LIMMA (Atrium)**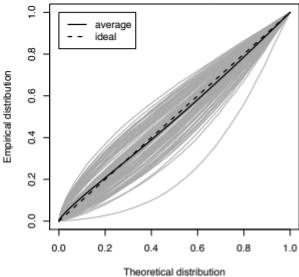**Weighted LIMMA (Atrium)**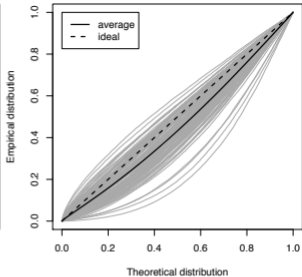**Ordinary Linear Model (Atrium)**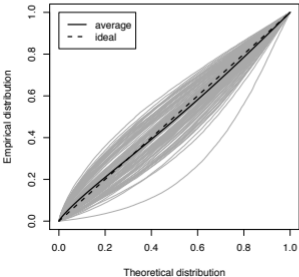**WAME (Atrium)**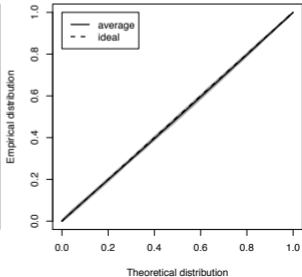

Supplement: 1471-2105-8-387-S3.pdf [file 1471-2105-8-387-S3.pdf]
